# Supplementary material
Source: MDPI journal article supplement (https://www.mdpi.com/2073-4352/12/3/315)
Supplement: s1 [file s1]

## Supplementary information

## 3.3. NMR Spectra Analyses

The  $^1\text{H}$ -NMR spectrum shows (Figure 1) six peaks, corresponded to the cyclohexyl ring protons of the primary ammonium cation. These peaks at ( $\delta$  2.90, 1.83, 1.66, 1.51, 1.24–1.17, and 1.09 ppm) were in agreement with those reported for the different proton environments in the cyclohexyl ring (Table 1) [1]. Due to the fast proton exchange with the deuterons of the solvent ( $\text{H/D}$  exchange), the peak of ammonium protons was not detected.

The  $^{13}\text{C}$ -NMR spectrum, in deuterated methanol, exhibited four peaks, corresponded to four different C-atom electronic environments of the cyclohexylammonium cation, at  $\delta$  51.45, 31.85, 25.82, and 25.29 ppm. The  $^{13}\text{C}$ -NMR analysis confirmed the absence of isothiocyanate carbon peak, as shown in Figure 2 and Table 2. The absence of isothiocyanate carbon peak was reported for many organic compounds in the Sigma-Aldrich spectral database. This phenomenon was due to the quadrupolar broadening effect by  $^{14}\text{N}$  [2].

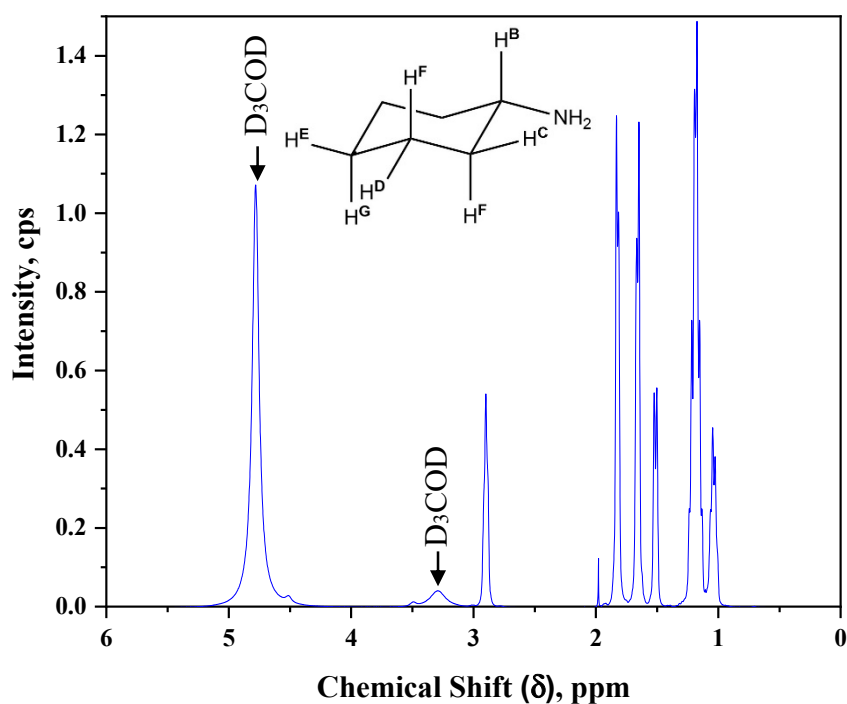

Figure S1.  $^1\text{H}$ -NMR spectrum of  $(\text{C}_6\text{H}_{11}\text{NH}_3)_4[\text{Ni}(\text{NCS})_6]\cdot 2\text{H}_2\text{O}$  in methanol- $\text{d}_4$ .

Table S1.  $^1\text{H}$ -NMR of  $(\text{C}_6\text{H}_{11}\text{NH}_3)_4[\text{Ni}(\text{NCS})_6]\cdot 2\text{H}_2\text{O}$  at room temperature.

| Hydrogen Atom Label | Chemical Shift ( $\delta$ ), ppm |                |
|---------------------|----------------------------------|----------------|
|                     | Sample*                          | Reference# [1] |
| B                   | 2.90                             | 3.16           |
| C                   | 1.83                             | 1.99           |
| D                   | 1.66                             | 1.80           |
| E                   | 1.51                             | 1.65           |
| F                   | 1.24–1.17                        | 1.41–1.28      |
| G                   | 1.09                             | 1.18           |

\*in  $\text{D}_3\text{COH}$ ; #in  $\text{D}_2\text{O}$

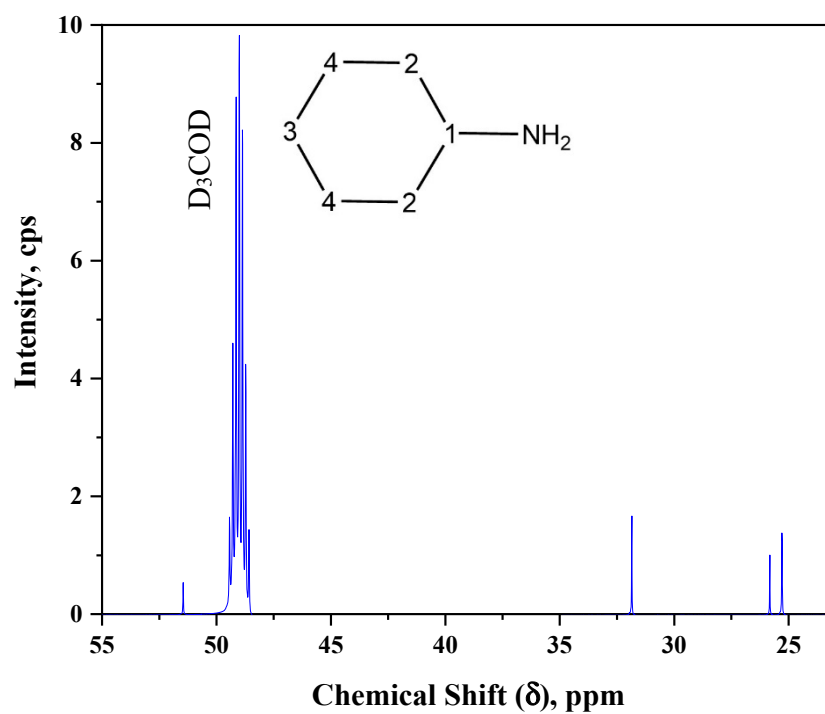

**Figure S2.**  $^{13}\text{C}$ -NMR spectrum of  $(\text{C}_6\text{H}_{11}\text{NH}_3)_4[\text{Ni}(\text{NCS})_6]\cdot 2\text{H}_2\text{O}$  in methanol- $\text{d}^4$ .

**Table S2.**  $^{13}\text{C}$ -NMR of  $(\text{C}_6\text{H}_{11}\text{NH}_3)_4[\text{Ni}(\text{NCS})_6]\cdot 2\text{H}_2\text{O}$  at room temperature.

| Carbon Atom Label | Chemical Shift ( $\delta$ ), ppm |                           |
|-------------------|----------------------------------|---------------------------|
|                   | Sample*                          | Reference# <sup>[1]</sup> |
| 1                 | 51.45                            | 51.25                     |
| 2                 | 31.85                            | 31.16                     |
| 3                 | 25.82                            | 25.14                     |
| 4                 | 25.29                            | 24.65                     |

\*in  $\text{D}_3\text{COH}$ ; #in  $\text{D}_2\text{O}$

## X-ray single crystal refinement

**Table S3.** Atomic coordinates and isotropic displacement parameters (in Å<sup>2</sup>) at 293K

| Atom  | Wyck. | x       | y       | z       | U      |
|-------|-------|---------|---------|---------|--------|
| Ni1   | 2b    | 1/2     | 1/2     | 1/2     |        |
| N1    | 4e    | 0.53658 | 0.30880 | 0.51275 |        |
| N2    | 4e    | 0.44986 | 0.46839 | 0.62033 |        |
| N3    | 4e    | 0.37397 | 0.45802 | 0.39675 |        |
| N4    | 4e    | 0.33841 | 1.18836 | 0.46720 |        |
| N5    | 4e    | 0.36148 | 0.72276 | 0.64339 |        |
| S1    | 4e    | 0.59085 | 0.08699 | 0.62352 |        |
| S2    | 4e    | 0.40879 | 0.28846 | 0.74309 |        |
| S3    | 4e    | 0.21257 | 0.50285 | 0.24277 |        |
| O1    | 4e    | 0.39125 | 0.99001 | 0.63085 |        |
| C1    | 4e    | 0.56000 | 0.21699 | 0.55840 |        |
| C2    | 4e    | 0.43268 | 0.39489 | 0.67139 |        |
| C3    | 4e    | 0.30703 | 0.47913 | 0.33269 |        |
| C4    | 4e    | 0.24090 | 1.17699 | 0.43440 |        |
| C5    | 4e    | 0.19746 | 1.21988 | 0.49624 |        |
| C6    | 4e    | 0.09706 | 1.19802 | 0.46481 |        |
| C7    | 4e    | 0.05372 | 1.15666 | 0.36515 |        |
| C8    | 4e    | 0.09770 | 1.11294 | 0.30616 |        |
| C9    | 4e    | 0.19851 | 1.13251 | 0.33639 |        |
| C10   | 4e    | 0.26264 | 0.71089 | 0.59908 |        |
| C11   | 4e    | 0.23139 | 0.75207 | 0.48904 |        |
| C12   | 4e    | 0.13048 | 0.74104 | 0.44354 |        |
| C13   | 4e    | 0.09716 | 0.61471 | 0.45988 |        |
| C14   | 4e    | 0.13086 | 0.57442 | 0.56773 |        |
| C15   | 4e    | 0.23172 | 0.58255 | 0.61018 |        |
| H1n5  | 4e    | 0.37943 | 0.69372 | 0.70553 | 0.0587 |
| H2n5  | 4e    | 0.38645 | 0.67992 | 0.60662 | 0.0587 |
| H3n5  | 4e    | 0.37654 | 0.80161 | 0.64400 | 0.0587 |
| H1n4  | 4e    | 0.35932 | 1.13799 | 0.43107 | 0.0734 |
| H2n4  | 4e    | 0.35285 | 1.26556 | 0.45860 | 0.0734 |
| H3n4  | 4e    | 0.36110 | 1.16831 | 0.53146 | 0.0734 |
| H1c4  | 4e    | 0.20817 | 1.11173 | 0.45445 | 0.1503 |
| H1c5  | 4e    | 0.20996 | 1.30787 | 0.50928 | 0.1967 |
| H2c5  | 4e    | 0.22591 | 1.18801 | 0.56405 | 0.1967 |
| H1c6  | 4e    | 0.06836 | 1.27295 | 0.47727 | 0.1997 |
| H2c6  | 4e    | 0.08452 | 1.14103 | 0.51205 | 0.1997 |
| H1c8  | 4e    | 0.06925 | 1.14181 | 0.23742 | 0.2346 |
| H2c8  | 4e    | 0.08404 | 1.02534 | 0.29243 | 0.2346 |
| H1c9  | 4e    | 0.22642 | 1.05551 | 0.32666 | 0.1774 |
| H2c9  | 4e    | 0.21122 | 1.18753 | 0.28803 | 0.1774 |
| H1c10 | 4e    | 0.23645 | 0.76536 | 0.63666 | 0.0688 |
| H1c11 | 4e    | 0.25886 | 0.70019 | 0.45109 | 0.1027 |
| H2c11 | 4e    | 0.24888 | 0.83789 | 0.48482 | 0.1027 |
| H1c12 | 4e    | 0.11204 | 0.75865 | 0.37167 | 0.1589 |
| H2c12 | 4e    | 0.10293 | 0.80423 | 0.47274 | 0.1589 |
| H1c13 | 4e    | 0.03284 | 0.61509 | 0.43624 | 0.1251 |
| H2c13 | 4e    | 0.11406 | 0.55386 | 0.41845 | 0.1251 |
| H1c14 | 4e    | 0.11239 | 0.48934 | 0.57299 | 0.1335 |
| H2c14 | 4e    | 0.10539 | 0.62686 | 0.60735 | 0.1335 |
| H1c15 | 4e    | 0.25180 | 0.55963 | 0.68111 | 0.1114 |
| H2c15 | 4e    | 0.25727 | 0.52417 | 0.57473 | 0.1114 |
| H1c7  | 4e    | 0.01143 | 1.21922 | 0.32857 | 0.2707 |
| H2c7  | 4e    | 0.00692 | 1.09885 | 0.36461 | 0.2707 |
| H2o1  | 4e    | 0.44573 | 1.00695 | 0.66388 | 0.0871 |
| H1o1  | 4e    | 0.36703 | 0.97653 | 0.67659 | 0.0871 |

**Table S4.** Atomic coordinates and isotropic displacement parameters (in Å<sup>2</sup>) at 120K

| Atom  | Wyck. | Occ. | x           | y           | z           | U           |
|-------|-------|------|-------------|-------------|-------------|-------------|
| Ni1   | 2b    | 1    | 1/2         | 1/2         | 1/2         | 0.01465(9)  |
| N1    | 4e    | 1    | 0.53600(8)  | 0.30622(10) | 0.51117(9)  | 0.0191(4)   |
| N2    | 4e    | 1    | 0.44970(9)  | 0.46714(12) | 0.62102(9)  | 0.0250(4)   |
| N3    | 4e    | 1    | 0.37322(8)  | 0.45878(12) | 0.39791(10) | 0.0253(4)   |
| N4    | 4e    | 1    | 0.33545(8)  | 1.19450(12) | 0.47487(11) | 0.0284(4)   |
| N5    | 4e    | 1    | 0.36212(7)  | 0.72287(10) | 0.64726(9)  | 0.0199(4)   |
| S1    | 4e    | 1    | 0.59313(2)  | 0.07899(3)  | 0.62162(2)  | 0.01988(11) |
| S2    | 4e    | 1    | 0.40741(2)  | 0.28245(3)  | 0.74631(3)  | 0.02125(12) |
| S3    | 4e    | 1    | 0.20928(3)  | 0.50369(4)  | 0.24497(4)  | 0.04281(17) |
| O1    | 4e    | 1    | 0.39426(8)  | 0.98799(10) | 0.63285(9)  | 0.0313(4)   |
| C1    | 4e    | 1    | 0.55992(8)  | 0.21187(11) | 0.55620(9)  | 0.0145(4)   |
| C2    | 4e    | 1    | 0.43231(8)  | 0.39104(12) | 0.67429(9)  | 0.0170(4)   |
| C3    | 4e    | 1    | 0.30523(11) | 0.47915(13) | 0.33384(12) | 0.0234(5)   |
| C4    | 4e    | 0.5  | 0.23204(19) | 1.2154(3)   | 0.4312(3)   | 0.0259(11)  |
| C4'   | 4e    | 0.5  | 0.24060(19) | 1.1530(4)   | 0.4557(2)   | 0.0257(10)  |
| C5'   | 4e    | 0.5  | 0.1916(3)   | 1.2443(5)   | 0.4987(4)   | 0.0384(15)  |
| C5    | 4e    | 0.5  | 0.1953(4)   | 1.1721(7)   | 0.5137(4)   | 0.064(2)    |
| C6    | 4e    | 1    | 0.09225(12) | 1.1987(3)   | 0.47528(17) | 0.0694(10)  |
| C7    | 4e    | 0.5  | 0.0478(2)   | 1.1914(5)   | 0.3590(3)   | 0.0490(15)  |
| C7'   | 4e    | 0.5  | 0.0508(3)   | 1.1148(5)   | 0.3812(5)   | 0.074(2)    |
| C8'   | 4e    | 0.5  | 0.0918(4)   | 1.1604(9)   | 0.2976(5)   | 0.093(4)    |
| C8    | 4e    | 0.5  | 0.0980(5)   | 1.0980(5)   | 0.3174(5)   | 0.0477(19)  |
| C9'   | 4e    | 0.5  | 0.1994(7)   | 1.1588(10)  | 0.3317(7)   | 0.041(2)    |
| C9    | 4e    | 0.5  | 0.1916(8)   | 1.1228(10)  | 0.3441(8)   | 0.042(2)    |
| C10   | 4e    | 1    | 0.26203(9)  | 0.71033(13) | 0.60192(11) | 0.0217(4)   |
| C11   | 4e    | 1    | 0.23233(10) | 0.75137(15) | 0.49020(12) | 0.0299(5)   |
| C12   | 4e    | 1    | 0.13001(11) | 0.74018(19) | 0.44497(15) | 0.0455(7)   |
| C13   | 4e    | 1    | 0.09806(11) | 0.60670(19) | 0.45719(14) | 0.0431(6)   |
| C14   | 4e    | 1    | 0.13082(12) | 0.56365(19) | 0.56836(15) | 0.0468(7)   |
| C15   | 4e    | 1    | 0.23306(11) | 0.57456(16) | 0.61224(13) | 0.0381(6)   |
| H1o1  | 4e    | 1    | 0.4499(8)   | 1.008(3)    | 0.642(2)    | 0.087(10)   |
| H2o1  | 4e    | 1    | 0.3907(19)  | 1.029(2)    | 0.6848(14)  | 0.082(8)    |
| H1n5  | 4e    | 1    | 0.37896     | 0.69519     | 0.71019     | 0.0238      |
| H2n5  | 4e    | 1    | 0.38822     | 0.67796     | 0.61143     | 0.0238      |
| H3n5  | 4e    | 1    | 0.37733     | 0.80274     | 0.64652     | 0.0238      |
| H1n4  | 4e    | 1    | 0.34860     | 1.11795     | 0.45938     | 0.0340      |
| H2n4  | 4e    | 1    | 0.36278     | 1.25057     | 0.44846     | 0.0340      |
| H3n4  | 4e    | 1    | 0.35287     | 1.20326     | 0.54123     | 0.0340      |
| H1c4  | 4e    | 0.5  | 0.21922     | 1.30250     | 0.40957     | 0.0311      |
| H1c4' | 4e    | 0.5  | 0.23641     | 1.07113     | 0.48542     | 0.0309      |
| H1c5' | 4e    | 0.5  | 0.19229     | 1.32682     | 0.46834     | 0.0461      |
| H2c5' | 4e    | 0.5  | 0.21978     | 1.24981     | 0.57154     | 0.0461      |
| H1c5  | 4e    | 0.5  | 0.22273     | 1.22046     | 0.57507     | 0.0771      |
| H2c5  | 4e    | 0.5  | 0.20559     | 1.08212     | 0.52494     | 0.0771      |
| H1c6  | 4e    | 1    | 0.08049     | 1.28074     | 0.49955     | 0.0833      |
| H2c6  | 4e    | 1    | 0.06244     | 1.14087     | 0.50825     | 0.0833      |
| H1c8  | 4e    | 0.5  | 0.07235     | 1.09457     | 0.24409     | 0.0573      |
| H2c8  | 4e    | 0.5  | 0.08875     | 1.01364     | 0.33973     | 0.0573      |
| H1c8' | 4e    | 0.5  | 0.07035     | 1.24477     | 0.27529     | 0.1119      |
| H2c8' | 4e    | 0.5  | 0.06798     | 1.10954     | 0.23692     | 0.1119      |
| H1c9  | 4e    | 0.5  | 0.22413     | 1.04360     | 0.35781     | 0.0503      |
| H2c9  | 4e    | 0.5  | 0.20580     | 1.15023     | 0.28429     | 0.0503      |
| H1c9' | 4e    | 0.5  | 0.23946     | 1.09170     | 0.32618     | 0.0488      |
| H2c9' | 4e    | 0.5  | 0.19476     | 1.22309     | 0.28040     | 0.0488      |
| H1c10 | 4e    | 1    | 0.23370     | 0.76516     | 0.63866     | 0.0260      |
| H1c11 | 4e    | 1    | 0.26032     | 0.69749     | 0.45247     | 0.0359      |
| H2c11 | 4e    | 1    | 0.25006     | 0.83839     | 0.48551     | 0.0359      |
| H1c12 | 4e    | 1    | 0.11173     | 0.76219     | 0.37351     | 0.0546      |
| H2c12 | 4e    | 1    | 0.10201     | 0.80005     | 0.47834     | 0.0546      |
| H1c13 | 4e    | 1    | 0.03345     | 0.60427     | 0.43235     | 0.0517      |
| H2c13 | 4e    | 1    | 0.11941     | 0.54840     | 0.41610     | 0.0517      |
| H1c14 | 4e    | 1    | 0.11314     | 0.47655     | 0.57282     | 0.0562      |
| H2c14 | 4e    | 1    | 0.10346     | 0.61552     | 0.60799     | 0.0562      |
| H1c15 | 4e    | 1    | 0.25214     | 0.55074     | 0.68335     | 0.0457      |
| H2c15 | 4e    | 1    | 0.26049     | 0.51804     | 0.57572     | 0.0457      |
| H1c7  | 4e    | 0.5  | 0.05027     | 1.27383     | 0.32927     | 0.0588      |
| H2c7  | 4e    | 0.5  | -0.01345    | 1.16367     | 0.34394     | 0.0588      |
| H1c7' | 4e    | 0.5  | -0.01324    | 1.12706     | 0.35715     | 0.0887      |
| H2c7' | 4e    | 0.5  | 0.06706     | 1.02723     | 0.39828     | 0.0887      |

**Table S5.** Anisotropic displacement parameters (in Å<sup>2</sup>) at 293K

| Atom | $U_{11}$ | $U_{22}$ | $U_{33}$ | $U_{12}$ | $U_{13}$ | $U_{23}$ |
|------|----------|----------|----------|----------|----------|----------|
| Ni1  | 0.04375  | 0.03138  | 0.03823  | 0.00450  | 0.01873  | 0.00683  |
| N1   | 0.05768  | 0.04025  | 0.05012  | 0.00675  | 0.02450  | 0.00790  |
| N2   | 0.06643  | 0.05153  | 0.05325  | 0.00899  | 0.03359  | 0.01107  |
| N3   | 0.05296  | 0.04922  | 0.06000  | 0.00451  | 0.01466  | 0.00189  |
| N4   | 0.04927  | 0.05470  | 0.07881  | -0.00038 | 0.02028  | 0.00128  |
| N5   | 0.04917  | 0.05030  | 0.04775  | -0.00478 | 0.01661  | -0.00049 |
| S1   | 0.07258  | 0.03955  | 0.04570  | 0.01425  | 0.01996  | 0.00998  |
| S2   | 0.07717  | 0.04223  | 0.05446  | -0.00630 | 0.03547  | 0.00205  |
| S3   | 0.07123  | 0.11976  | 0.07325  | 0.01187  | 0.00197  | 0.03321  |
| O1   | 0.07463  | 0.06672  | 0.07349  | -0.00157 | 0.02056  | -0.01157 |
| C1   | 0.03862  | 0.03418  | 0.03629  | 0.00263  | 0.01558  | -0.00028 |
| C2   | 0.04512  | 0.03994  | 0.03624  | 0.00343  | 0.01724  | -0.00328 |
| C3   | 0.05808  | 0.04623  | 0.04936  | 0.00309  | 0.02277  | 0.00552  |
| C4   | 0.04996  | 0.20088  | 0.12823  | -0.04102 | 0.03414  | -0.06576 |
| C5   | 0.06077  | 0.31053  | 0.11834  | -0.00547 | 0.02673  | -0.10671 |
| C6   | 0.06245  | 0.30535  | 0.13970  | -0.00691 | 0.04444  | -0.05991 |
| C7   | 0.04619  | 0.39358  | 0.20980  | 0.00888  | 0.00585  | -0.11205 |
| C8   | 0.07329  | 0.33452  | 0.14005  | -0.00151 | -0.01634 | -0.12579 |
| C9   | 0.07301  | 0.25834  | 0.09231  | 0.03564  | 0.00082  | -0.08158 |
| C10  | 0.04580  | 0.06477  | 0.06298  | -0.00233 | 0.01997  | -0.00275 |
| C11  | 0.06125  | 0.10332  | 0.07385  | -0.01622 | -0.00217 | 0.03207  |
| C12  | 0.06657  | 0.13789  | 0.14890  | -0.01129 | -0.02324 | 0.05605  |
| C13  | 0.05201  | 0.14106  | 0.10521  | -0.02726 | 0.00671  | 0.00609  |
| C14  | 0.06553  | 0.14926  | 0.11060  | -0.04374 | 0.01805  | 0.02163  |
| C15  | 0.07005  | 0.09866  | 0.09322  | -0.03101 | 0.00496  | 0.03051  |

**Table S6.** Anisotropic displacement parameters (in Å<sup>2</sup>) at 120K

| Atom | $U_{11}$    | $U_{22}$    | $U_{33}$    | $U_{12}$     | $U_{13}$    | $U_{23}$    |
|------|-------------|-------------|-------------|--------------|-------------|-------------|
| Ni1  | 0.01924(14) | 0.01153(13) | 0.01501(14) | 0.00183(8)   | 0.00802(10) | 0.00277(7)  |
| N1   | 0.0216(6)   | 0.0160(5)   | 0.0214(6)   | 0.0018(4)    | 0.0093(5)   | 0.0014(4)   |
| N2   | 0.0330(7)   | 0.0237(6)   | 0.0240(6)   | 0.0063(5)    | 0.0170(5)   | 0.0053(5)   |
| N3   | 0.0245(6)   | 0.0209(6)   | 0.0282(6)   | 0.0018(5)    | 0.0051(5)   | -0.0029(5)  |
| N4   | 0.0212(6)   | 0.0233(6)   | 0.0421(8)   | -0.0033(5)   | 0.0123(6)   | -0.0041(5)  |
| N5   | 0.0207(6)   | 0.0214(5)   | 0.0174(5)   | -0.0019(4)   | 0.0059(4)   | -0.0013(4)  |
| S1   | 0.02611(18) | 0.01576(16) | 0.01744(17) | 0.00481(12)  | 0.00641(13) | 0.00433(11) |
| S2   | 0.02963(19) | 0.01675(16) | 0.02051(18) | -0.00238(12) | 0.01238(15) | 0.00097(11) |
| S3   | 0.0323(2)   | 0.0514(3)   | 0.0358(3)   | 0.00615(18)  | -0.0019(2)  | 0.01708(18) |
| O1   | 0.0298(6)   | 0.0307(6)   | 0.0337(7)   | -0.0031(4)   | 0.0103(5)   | -0.0114(4)  |
| C1   | 0.0151(6)   | 0.0148(6)   | 0.0150(6)   | -0.0010(4)   | 0.0068(5)   | -0.0018(4)  |
| C2   | 0.0194(6)   | 0.0174(6)   | 0.0150(6)   | 0.0036(5)    | 0.0067(5)   | -0.0019(5)  |
| C3   | 0.0291(7)   | 0.0182(6)   | 0.0253(7)   | 0.0014(5)    | 0.0118(6)   | 0.0013(5)   |
| C4   | 0.0181(14)  | 0.0147(14)  | 0.047(2)    | 0.0034(11)   | 0.0126(13)  | 0.0110(13)  |
| C4'  | 0.0185(14)  | 0.0255(16)  | 0.0286(16)  | -0.0021(13)  | 0.0008(12)  | 0.0011(13)  |
| C5'  | 0.0222(18)  | 0.065(3)    | 0.027(2)    | -0.005(2)    | 0.0068(17)  | -0.020(2)   |
| C5   | 0.0205(19)  | 0.145(7)    | 0.028(2)    | 0.003(4)     | 0.0089(16)  | 0.007(4)    |
| C6   | 0.0208(9)   | 0.142(2)    | 0.0493(12)  | -0.0085(11)  | 0.0164(9)   | -0.0142(13) |
| C7   | 0.0198(17)  | 0.069(3)    | 0.050(2)    | 0.004(2)     | -0.0001(16) | -0.011(2)   |
| C7'  | 0.0208(19)  | 0.036(2)    | 0.152(6)    | -0.0041(18)  | 0.009(3)    | -0.021(3)   |
| C8'  | 0.025(2)    | 0.207(10)   | 0.034(3)    | 0.019(5)     | -0.010(2)   | -0.038(5)   |
| C8   | 0.045(3)    | 0.044(2)    | 0.040(3)    | -0.008(2)    | -0.007(2)   | -0.013(2)   |
| C9'  | 0.020(2)    | 0.081(6)    | 0.017(3)    | 0.001(3)     | 0.001(2)    | -0.012(3)   |
| C9   | 0.035(4)    | 0.067(5)    | 0.027(3)    | 0.014(3)     | 0.014(2)    | -0.003(3)   |
| C10  | 0.0165(6)   | 0.0260(7)   | 0.0239(7)   | -0.0025(5)   | 0.0085(5)   | -0.0028(5)  |
| C11  | 0.0215(7)   | 0.0330(8)   | 0.0301(8)   | -0.0041(6)   | 0.0008(6)   | 0.0105(6)   |
| C12  | 0.0232(8)   | 0.0510(11)  | 0.0505(12)  | -0.0008(7)   | -0.0051(8)  | 0.0123(9)   |
| C13  | 0.0206(8)   | 0.0597(11)  | 0.0432(10)  | -0.0144(7)   | 0.0016(7)   | 0.0014(8)   |
| C14  | 0.0297(9)   | 0.0623(13)  | 0.0461(11)  | -0.0225(8)   | 0.0087(8)   | 0.0085(9)   |
| C15  | 0.0324(8)   | 0.0407(9)   | 0.0343(9)   | -0.0164(7)   | 0.0008(7)   | 0.0117(7)   |

## References

- [1] "Spectral Database for Organic Compounds SDBS," [https://sdb.sdb.aist.go.jp/sdb/cgi-bin/direct\\_frame\\_top.cgi](https://sdb.sdb.aist.go.jp/sdb/cgi-bin/direct_frame_top.cgi) (accessed on 30/01/2022).
- [2] R. Glaser, R. Hillebrand, W. Wycoff, C. Camasta, and K. S. Gates, "Near-silence of isothiocyanate carbon in  $^{13}\text{C}$  NMR spectra: a case study of allyl isothiocyanate," *The Journal of organic chemistry*, vol. 80, no. 9, pp. 4360-4369, 2015. doi.org/10.1021/acs.joc.5b00080
